# Supplementary material for: P-doped nickel sulfide nanosheet arrays for alkaline overall water splitting
Source: Royal Society of Chemistry journal article supplement (doi:10.1039/d0cy01577f), 2020-01-01
Supplement: d0cy01577f1.pdf [file d0cy01577f1.pdf]

## Supporting Information

### **P-Doped Nickel Sulfide Nanosheet Arrays for Highly Efficient Overall Water Splitting**

Wenjun He,<sup>a</sup> Dongbo Jia,<sup>a</sup> Jianing Cheng,<sup>a</sup> Fangqing Wang,<sup>a</sup> Liang Zhang,<sup>a</sup> Ying Li,<sup>a</sup>

Caichi Liu,<sup>a</sup> Qiuyan Hao<sup>\*,a</sup> Jianling Zhao,<sup>\*,a</sup>

<sup>a</sup> School of Material Science and Engineering, Hebei University of Technology,  
Dingzigu Road 1, Tianjin 300130, P. R. China

**E-mail address:** [haoqiuyan@hebut.edu.cn](mailto:haoqiuyan@hebut.edu.cn) (QY. Hao). [hebutzhaoj@126.com](mailto:hebutzhaoj@126.com) (JL. Zhao)

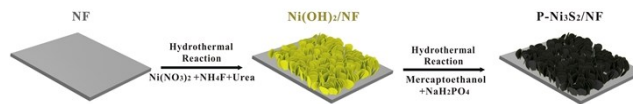

**Fig. S1** The schematic illustration of the synthesis process for the P-Ni<sub>3</sub>S<sub>2</sub> grown on Ni foam.

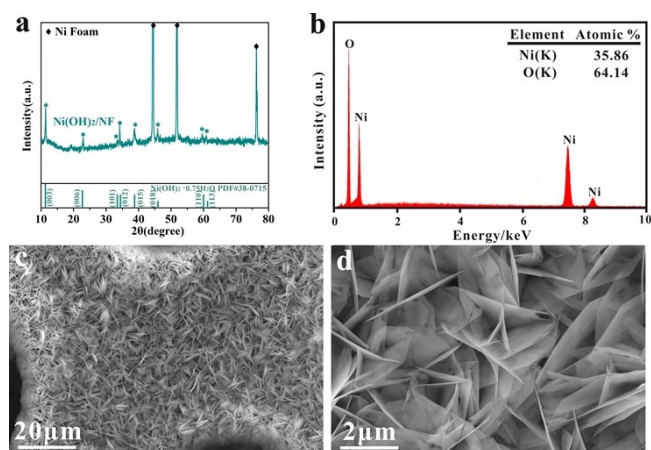

**Fig. S2** (a) XRD pattern, (b) EDX spectrum and (c, d) SEM images of Ni(OH)<sub>2</sub>/NF.

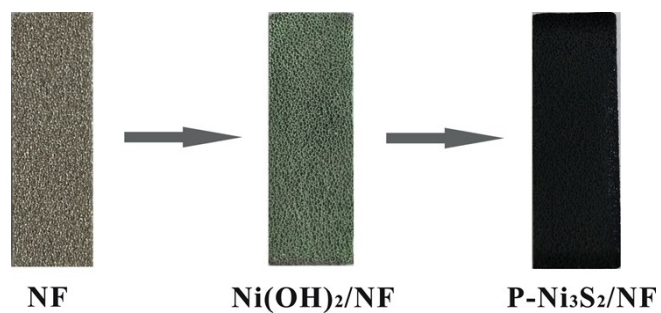

**Fig. S3** Photographic images of Ni foam (NF), Ni(OH)<sub>2</sub>/NF and P-Ni<sub>3</sub>S<sub>2</sub>/NF.

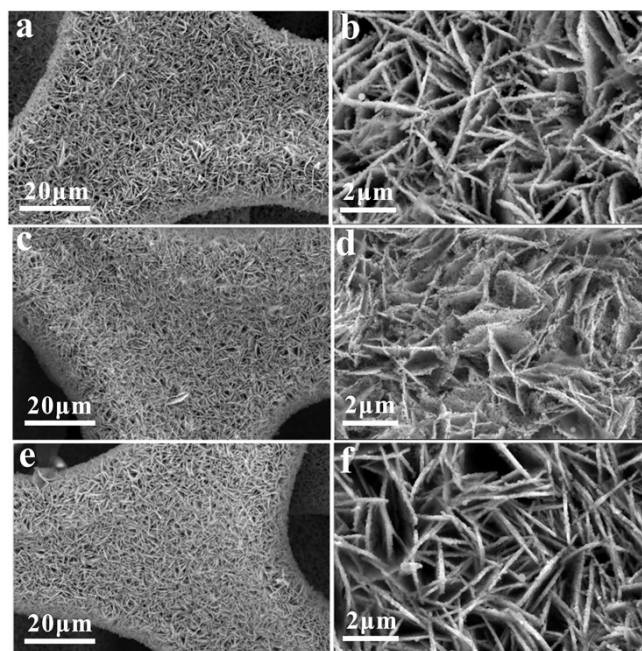

**Fig. S4** SEM image of (a-b) P<sub>3.0%</sub>-Ni<sub>3</sub>S<sub>2</sub>/NF, (c-d) P<sub>22.1%</sub>-Ni<sub>3</sub>S<sub>2</sub>/NF and (e-f) Ni<sub>3</sub>S<sub>2</sub>/NF.

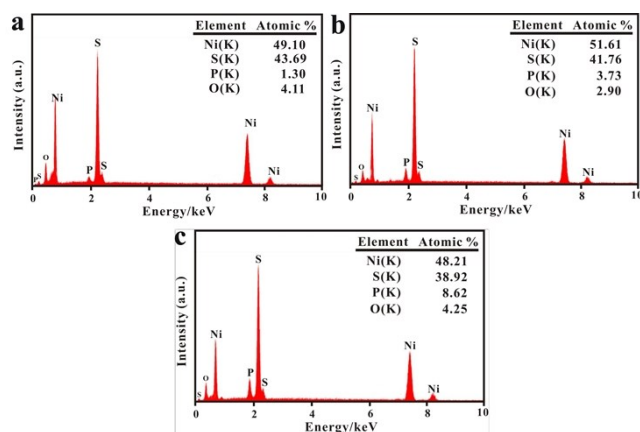

**Fig. S5** EDX elemental mapping of (a) P<sub>3.0%</sub>-Ni<sub>3</sub>S<sub>2</sub>/NF, (b) P<sub>8.9%</sub>-Ni<sub>3</sub>S<sub>2</sub>/NF and (c) P<sub>22.1%</sub>-Ni<sub>3</sub>S<sub>2</sub>/NF.

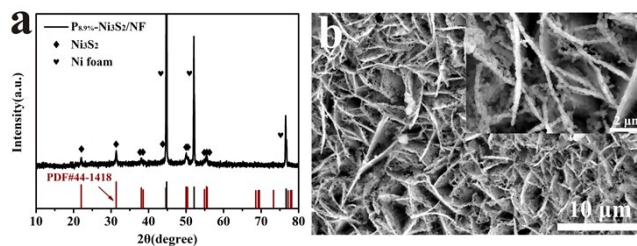

**Fig. S6** (a) XRD pattern and (b) SEM of P<sub>8.9%</sub>-Ni<sub>3</sub>S<sub>2</sub>/NF after HER.

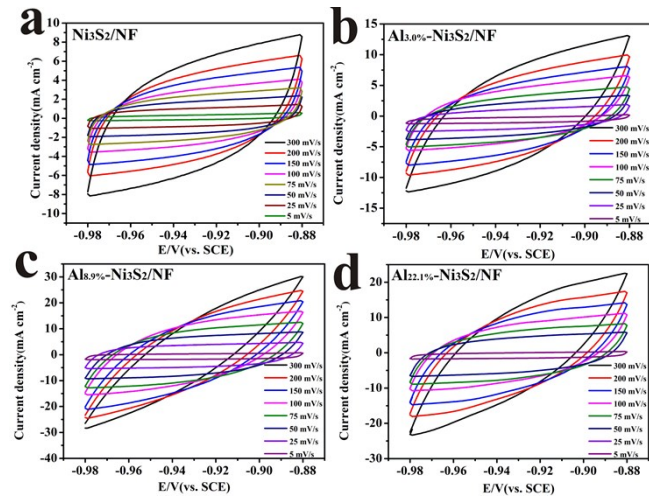

**Fig. S7** Typical cyclic voltammetry curves of (a)  $\text{Ni}_3\text{S}_2/\text{NF}$ , (b)  $\text{P}_{3.0\%}\text{-Ni}_3\text{S}_2/\text{NF}$ , (c)  $\text{P}_{8.9\%}\text{-Ni}_3\text{S}_2/\text{NF}$  and (d)  $\text{P}_{22.1\%}\text{-Ni}_3\text{S}_2/\text{NF}$  with different scan rates in 1M KOH.

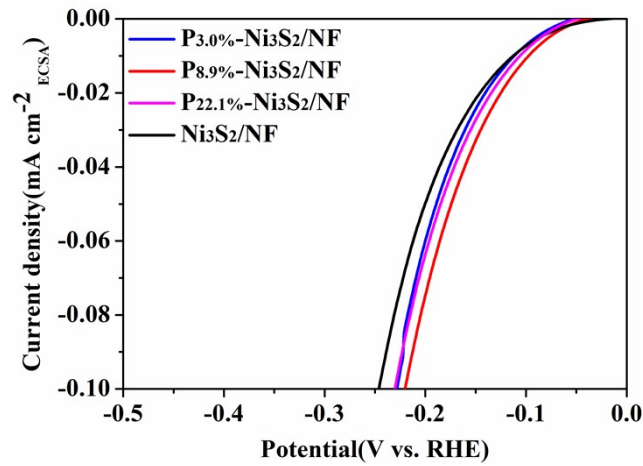

**Fig. S8** Polarization curves from normalized to the electrochemical active surface area (ECSA) for HER.

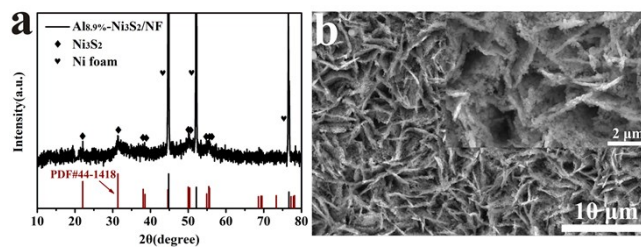

**Fig. S9** D(a) XRD pattern and (b) SEM of  $\text{P}_{8.9\%}\text{-Ni}_3\text{S}_2/\text{NF}$  after OER.

**Table S1.** S/P Feed Ratio and Atomic Ratio of the synthesized  $P_{x\%}$ -Ni<sub>3</sub>S<sub>2</sub>/NF.

| Sample                                             | Precursor ratio (S: P)<br>(mmol : mmol) | S: P atomic ratio<br>(determined by EDS) |
|----------------------------------------------------|-----------------------------------------|------------------------------------------|
| P <sub>3.0%</sub> -Ni <sub>3</sub> S <sub>2</sub>  | 34.17 : 0.342 = 100 : 1                 | 39.32 : 1.65 = 23.83 : 1                 |
| P <sub>8.9%</sub> -Ni <sub>3</sub> S <sub>2</sub>  | 34.17 : 1.026 = 33 : 1                  | 37.94 : 3.73 = 10.17 : 1                 |
| P <sub>22.1%</sub> -Ni <sub>3</sub> S <sub>2</sub> | 34.17 : 1.710 = 20 : 1                  | 34.22 : 5.31 = 6.45 : 1                  |

**Table S2.** The chemical composition of P-Ni<sub>3</sub>S<sub>2</sub> and Ni<sub>3</sub>S<sub>2</sub> measured by XPS.

| Samples                                            | Atomic Percentage (At %) |      |       | P Doping concentration (At %) |                            |
|----------------------------------------------------|--------------------------|------|-------|-------------------------------|----------------------------|
|                                                    | Ni                       | P    | S     | O                             | $\frac{n(P)}{n(P) + n(S)}$ |
| Ni <sub>3</sub> S <sub>2</sub>                     | 15.75                    | --   | 10.80 | 28.07                         | --                         |
| P <sub>3.0%</sub> -Ni <sub>3</sub> S <sub>2</sub>  | 16.28                    | 0.35 | 10.62 | 29.46                         | 3.19                       |
| P <sub>8.9%</sub> -Ni <sub>3</sub> S <sub>2</sub>  | 16.14                    | 1.02 | 10.44 | 30.54                         | 8.90                       |
| P <sub>22.1%</sub> -Ni <sub>3</sub> S <sub>2</sub> | 16.07                    | 2.90 | 10.25 | 31.77                         | 22.05                      |

**Table S3.** Comparison of the HER performance of P<sub>8.9%</sub>-Ni<sub>3</sub>S<sub>2</sub>/NF with other well-performed electrocatalysts.

| Catalysts                                                | $\eta@10 \text{ mA cm}^{-2}$<br>mV | $\eta@20 \text{ mA cm}^{-2}$<br>mV | $\eta@100 \text{ mA cm}^{-2}$<br>mV | Tafel slope<br>mV dec <sup>-1</sup> | Ref.      |
|----------------------------------------------------------|------------------------------------|------------------------------------|-------------------------------------|-------------------------------------|-----------|
| P <sub>8.9%</sub> -Ni <sub>3</sub> S <sub>2</sub> /NF    | 101                                | 127                                | 224                                 | 85                                  | This work |
| Ni <sub>3</sub> S <sub>2</sub> /NF                       | 137                                | 159                                | 230                                 | 96                                  | 1         |
| N-Ni <sub>3</sub> S <sub>2</sub> /NF                     | 110                                | ~160                               | ~230                                | --                                  | 2         |
| Sn-Ni <sub>3</sub> S <sub>2</sub> /NF                    | 137                                | ~200                               | ~320                                | 148                                 | 3         |
| N-Ni <sub>3</sub> S <sub>2</sub> @C/NF                   | 113                                | --                                 | --                                  | 90                                  | 4         |
| Fe <sub>11.1%</sub> - Ni <sub>3</sub> S <sub>2</sub> /NF | 126                                | --                                 | --                                  | 89                                  | 5         |
| Fe <sub>17.5%</sub> - Ni <sub>3</sub> S <sub>2</sub> /NF | 47                                 | 142                                | 232                                 | 95                                  | 6         |

|                                                                                      |     |     |     |      |    |
|--------------------------------------------------------------------------------------|-----|-----|-----|------|----|
| Ni <sub>1.5</sub> Fe <sub>0.5</sub> P/CF                                             | 282 | --  | --  | 125  | 7  |
| H-Co <sub>0.85</sub> Se P                                                            | 150 | 180 | --  | 83   | 8  |
| Ni <sub>2</sub> P-NiSe <sub>2</sub> /CC                                              | 66  | --  | --  | 72.6 | 9  |
| Ni <sub>x</sub> Co <sub>3-x</sub> S <sub>4</sub> /Ni <sub>3</sub> S <sub>2</sub> /NF | 136 | --  | 258 | 107  | 10 |
| NiFe LDH@NiCoP/NF                                                                    | 120 | --  | --  | 88.2 | 11 |
| P <sub>9.03%</sub> -(Ni, Fe) <sub>3</sub> S <sub>2</sub> /NF                         | 98  | 126 | 218 | 88   | 12 |

**Table S4.** EIS and C<sub>dl</sub> results of P<sub>x%</sub>-Ni<sub>3</sub>S<sub>2</sub>/NF, Ni<sub>3</sub>S<sub>2</sub>/NF. (x=3.0, 8.9 and 22.1)

| Sample                                 | Ni <sub>3</sub> S <sub>2</sub> | P <sub>4.2%</sub> -(Ni, Fe) <sub>3</sub> S <sub>2</sub> /NF | P <sub>8.9%</sub> -(Ni, Fe) <sub>3</sub> S <sub>2</sub> /NF | P <sub>15.5%</sub> -(Ni, Fe) <sub>3</sub> S <sub>2</sub> /NF |
|----------------------------------------|--------------------------------|-------------------------------------------------------------|-------------------------------------------------------------|--------------------------------------------------------------|
| Rct [Ω]                                | 4.05                           | 2.03                                                        | 1.83                                                        | 2.30                                                         |
| C <sub>dl</sub> [mF cm <sup>-2</sup> ] | 18.4                           | 36.8                                                        | 42.6                                                        | 32.5                                                         |

**Table S5.** Comparison of the OER performance of P<sub>8.9%</sub>-Ni<sub>3</sub>S<sub>2</sub>/NF with other well-performed electrocatalysts.

| Catalysts                                                    | η@10 mA cm <sup>-2</sup><br>mV | η@20 mA cm <sup>-2</sup><br>mV | η@100 mA cm <sup>-2</sup><br>mV | Tafel slope<br>mV dec <sup>-1</sup> | Ref.      |
|--------------------------------------------------------------|--------------------------------|--------------------------------|---------------------------------|-------------------------------------|-----------|
| P <sub>8.9%</sub> -Ni <sub>3</sub> S <sub>2</sub> /NF        | 256                            | 267                            | 330                             | 30                                  | This work |
| N-Ni <sub>3</sub> S <sub>2</sub> /NF                         | --                             | --                             | 330                             | 79                                  | 2         |
| Fe-Ni <sub>3</sub> S <sub>2</sub> /FeNi                      | 282                            | --                             | --                              | 54                                  | 13        |
| Ni/NiS                                                       | --                             | ~320                           | ~390                            | 109.8                               | 14        |
| MoS <sub>2</sub> /Ni <sub>3</sub> S <sub>2</sub>             | 218                            | --                             | ~290                            | 88                                  | 15        |
| NiFe LDH@NiCoP/NF                                            | 220                            | --                             | --                              | 48.6                                | 11        |
| Ni <sub>0.36</sub> Fe <sub>2.64</sub> O <sub>4</sub> /Ni     | 225                            | --                             | --                              | 44                                  | 16        |
| P <sub>9.03%</sub> -(Ni, Fe) <sub>3</sub> S <sub>2</sub> /NF | 224                            | 239                            | 277                             | 30                                  | 12        |

**Table S6.** Comparison of the Overall water splitting performance of P<sub>8.9%</sub>-Ni<sub>3</sub>S<sub>2</sub>/NF with other well-performed electrocatalysts.

|                                                                 | $\eta@10 \text{ mA cm}^{-2}$<br>mV | $\eta@20 \text{ mA cm}^{-2}$<br>mV | $\eta@100 \text{ mA cm}^{-2}$<br>mV | Ref.      |
|-----------------------------------------------------------------|------------------------------------|------------------------------------|-------------------------------------|-----------|
| P <sub>8.9%</sub> -Ni <sub>3</sub> S <sub>2</sub> /NF           | 1.63                               | 1.68                               | 1.84                                | This work |
| Fe <sub>11.1%</sub> -Ni <sub>3</sub> S <sub>2</sub> /NF         | 1.60                               | 1.66                               | --                                  | 5         |
| H-Co <sub>0.85</sub> Se P                                       | 1.64                               | --                                 | --                                  | 8         |
| Ni <sub>1.5</sub> Fe <sub>0.5</sub> P/CF                        | 1.589                              | 1.635                              | --                                  | 7         |
| P <sub>9.03%</sub> -(Ni, Fe) <sub>3</sub> S <sub>2</sub><br>/NF | 1.54                               | 1.58                               | 1.72                                | 12        |

## Reference

1. G. Ren, Q. Hao, J. Mao, L. Liang, H. Liu, C. Liu and J. Zhang, *Nanoscale*, 2018, **10**, 17347-17353.
2. P. Chen, T. Zhou, M. Zhang, T. Yun, C. Zhong, Z. Nan, L. Zhang, C. Wu and X. Yi, *Adv. Mater.*, 2017, **29**.
3. J. Yu, F. X. Ma, Y. Du, P. P. Wang, C. Y. Xu and L. Zhen, *Chemelectrochem*, 2017, **4**.
4. Q. Hao, S. Li, H. Liu, J. Mao, Y. Li, C. Liu, J. Zhang and C. Tang, *Catal. Sci. Technol.*, 2019, **9**, 3099-3108.
5. W. Zhu, Z. Yue, W. Zhang, N. Hu, Z. Luo, M. Ren, Z. Xu, Z. Wei, Y. Suo and J. Wang, *J. Mater. Chem. A*, 2018, **6**.
6. G. Zhang, Y. S. Feng, W. T. Lu, D. He, C. Y. Wang, Y. K. Li, X. Y. Wang and F. F. Cao, *Acs Catal.*, 2018, **8**.
7. H. Huang, C. Yu, C. Zhao, X. Han, J. Yang, Z. Liu, S. Li, M. Zhang and J. Qiu, *Nano Energy*, 2017, **34**, 472-480.
8. Y. Hou, M. Qiu, T. Zhang, X. Zhuang, C. S. Kim, C. Yuan and X. Feng, *Adv. Mater.*, 2017, **29**.
9. C. Liu, T. Gong, J. Zhang, X. Zheng, J. Mao, H. Liu, Y. Li and Q. Hao, *Appl. Catal. B*, 2020, **262**, 118245.
10. Y. Wu, Y. Liu, G.-D. Li, X. Zou, X. Lian, D. Wang, L. Sun, T. Asefa and X. Zou, *Nano Energy*, 2017, **35**, 161-170.
11. H. Zhang, X. Li, A. Hähnel, V. Naumann, C. Lin, S. Azimi, S. L. Schweizer, A. W. Maijenburg and R. B. Wehrspohn, *Adv. Funct. Mater.*, 2018, 1706847.
12. C. Liu, D. Jia, Q. Hao, X. Zheng, Y. Li, C. Tang, H. Liu, J. Zhang and X. Zheng, *ACS Appl. Mater. Interfaces*, 2019, **11**, 27667-27676.
13. C. Z. Yuan, Z. T. Sun, Y. F. Jiang, Z. K. Yang, N. Jiang, Z. W. Zhao, U. Y. Qazi, W. H. Zhang and A. W. Xu, *Small*, 2017, **13**, 8.
14. G. F. Chen, T. Y. Ma, Z. Q. Liu, N. Li, Y. Z. Su, K. Davey and S. Z. Qiao, *Adv. Funct. Mater.*, 2016, **26**, 3314-3323.
15. J. Zhang, T. Wang, D. Pohl, B. Rellinghaus, R. Dong, S. Liu, X. Zhuang and



- X. Feng, *Angew. Chem., Int. Ed.*, 2016, **55**, 6702-6707.
16. J. Huang, J. Han, R. Wang, Y. Zhang, X. Wang, X. Zhang, Z. Zhang, Y. Zhang, B. Song and S. Jin, *Acs Energy Lett.*, 2018, **3**, 1698-1707.
